# Supplementary material for: Understanding methane/carbon dioxide partitioning in clay nano- and meso-pores with constant reservoir composition molecular dynamics modeling
Source: Royal Society of Chemistry journal article supplement (doi:10.1039/c9cp00851a), 2019-01-01
Supplement: c9cp00851a1.pdf [file c9cp00851a1.pdf]

# Electronic Supplementary Information

## for

### Understanding Methane/Carbon Dioxide Partitioning in Clay Nano- and Meso-Pores with Constant Reservoir Composition

### Molecular Dynamics Modeling

Narasimhan Loganathan<sup>1</sup>, Geoffrey M. Bowers<sup>2</sup>, Brice F. Ngouana Wakou<sup>3</sup>,

Andrey G. Kalinichev<sup>3</sup>, R. James Kirkpatrick<sup>1,4</sup> A. Ozgur Yazaydin<sup>1,5,\*</sup>

<sup>1</sup> Department of Chemistry, Michigan State University, East Lansing, Michigan 48824,  
United States

<sup>2</sup> Department of Chemistry and Biochemistry, St. Mary's College of Maryland, St. Mary's  
City, Maryland 20686, United States

<sup>3</sup> Laboratoire SUBATECH (UMR 6457 - Institut Mines-Télécom Atlantique, Université de  
Nantes, CNRS/IN2P3), 44307, Nantes, France

<sup>4</sup> Department of Earth and Environmental Sciences, Michigan State University, East Lansing,  
Michigan 48824, United States

<sup>5</sup> Department of Chemical Engineering, University College London, London, WC1E 7JE,  
United Kingdom.

\* **Corresponding author e-mail:** [ozgur.yazaydin@ucl.ac.uk](mailto:ozgur.yazaydin@ucl.ac.uk)

Contains  
Figures: 1

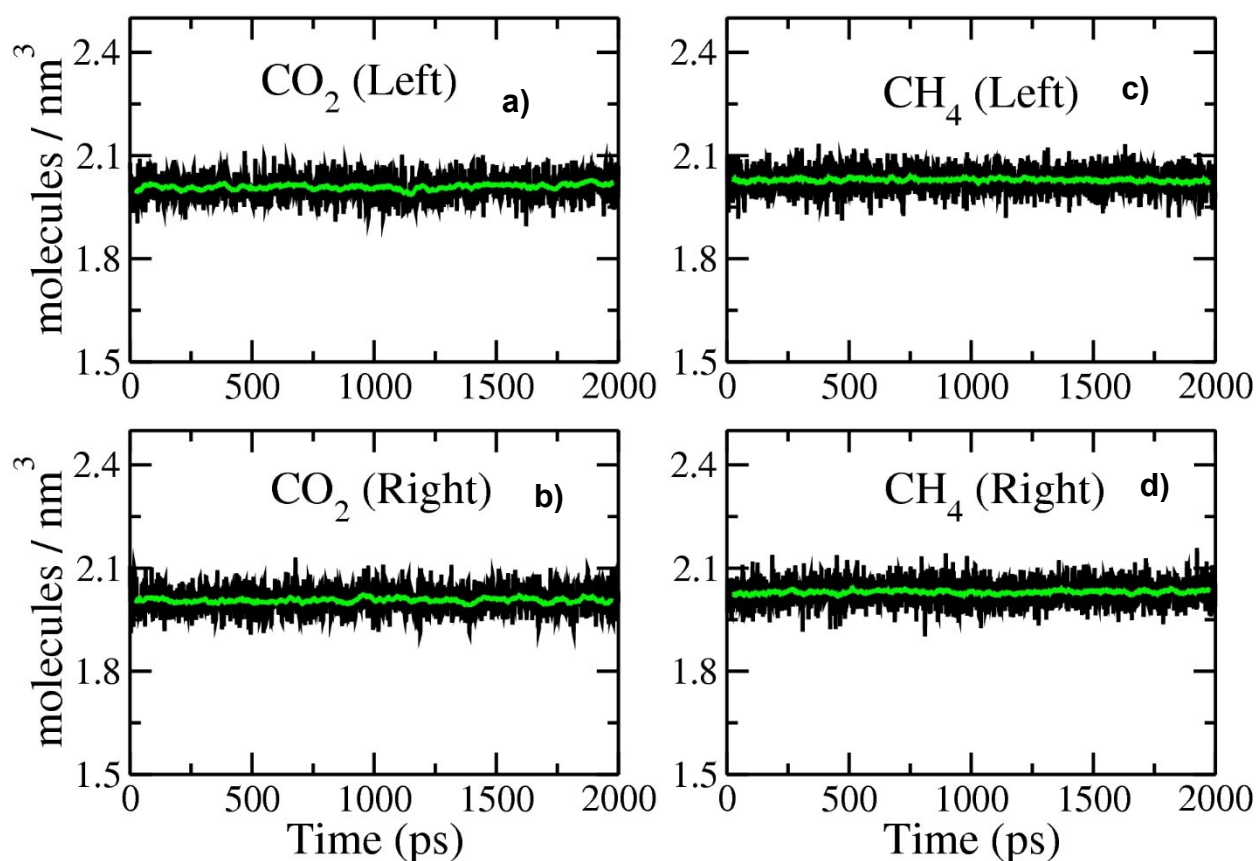

**Figure S1.** Concentration variation in the left and right control regions for CO<sub>2</sub> (a and b) and CH<sub>4</sub> (c and d) as a function of simulation time during the production run in the system with a pore thickness of 43.0 Å. The target densities for both molecules were set to 2 molecules/nm<sup>3</sup>. The concentration variation in systems with other pore thicknesses is comparably small. Black lines represent the instantaneous concentration values, and the green lines the average values with block sizes of 50.
